# Supplementary material for: Mechanisms of Congenital Heart Disease Caused by NAA15 Haploinsufficiency
Source: PubMed Central journal article supplement — Circ Res. 2021 Feb 9;128(8):1156–69. doi: 10.1161/CIRCRESAHA.120.316966 (PMC8048381; doi:10.1161/circresaha.120.316966), 2021-02-09

Gel copy 1

(Replicate 1)

(Replicate 2)

SMAD2<sup>+/+</sup>

SMAD2<sup>+/-</sup>

SMAD2<sup>+/-</sup>

SMAD2<sup>-/-</sup>

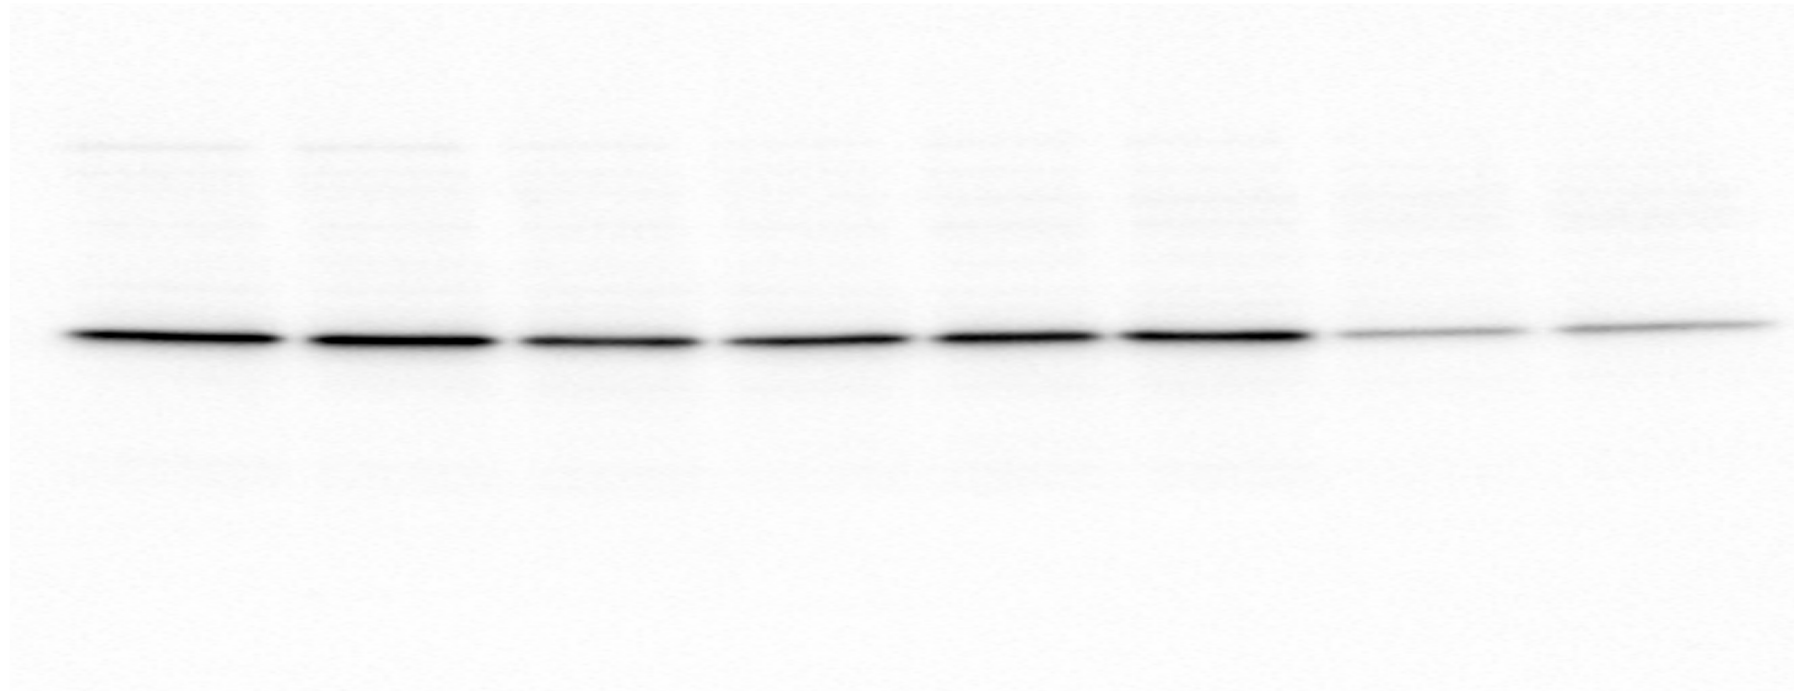

NAA10

Gel copy 2

(Replicate 1)

(Replicate 2)

SMAD2<sup>+/+</sup>

SMAD2<sup>+/-</sup>

SMAD2<sup>+/-</sup>

SMAD2<sup>-/-</sup>

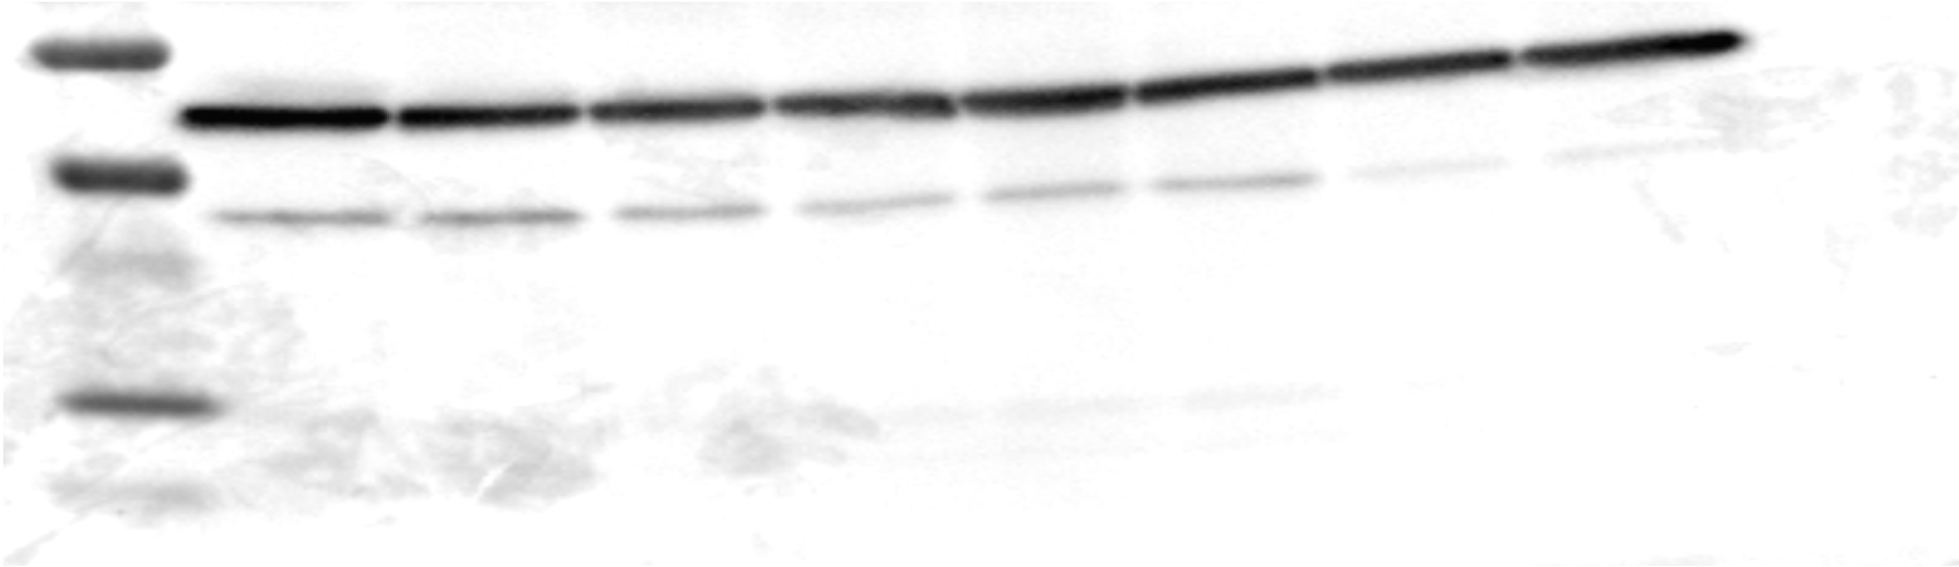

Beta-actin (46kda)

NAA10

Gel copy 2

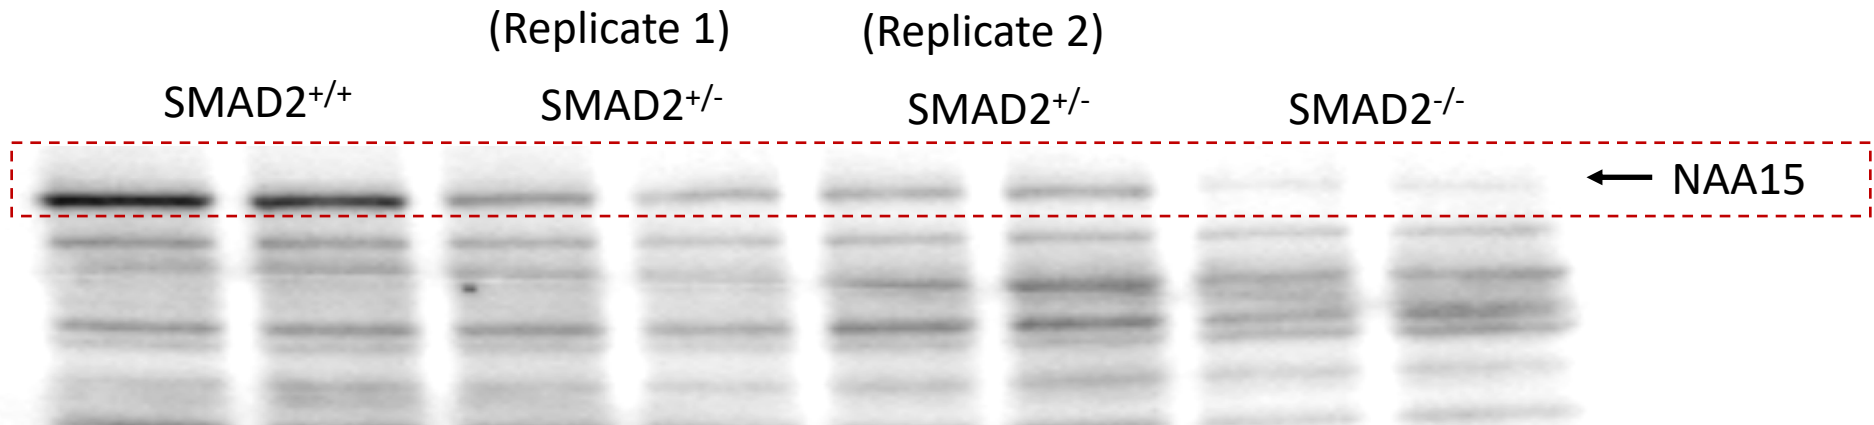

Supplement: res-128-1156-s009.pdf [file res-128-1156-s009.pdf]
