# Supplementary material for: Mechanisms of Congenital Heart Disease Caused by NAA15 Haploinsufficiency
Source: PubMed Central journal article supplement — Circ Res. 2021 Feb 9;128(8):1156–69. doi: 10.1161/CIRCRESAHA.120.316966 (PMC8048381; doi:10.1161/circresaha.120.316966), 2021-02-09
Supplement: res-128-1156-s013.pdf [file res-128-1156-s013.pdf]

## Major Resources Table

In order to allow validation and replication of experiments, all essential research materials listed in the Methods should be included in the Major Resources Table below. Authors are encouraged to use public repositories for protocols, data, code, and other materials and provide persistent identifiers and/or links to repositories when available. Authors may add or delete rows as needed.

### Animals (in vivo studies)

| Species | Vendor or Source | Background Strain | Sex | Persistent ID / URL |
|---------|------------------|-------------------|-----|---------------------|
|         |                  |                   |     |                     |
|         |                  |                   |     |                     |
|         |                  |                   |     |                     |

### Genetically Modified Animals

|                 | Species | Vendor or Source | Background Strain | Other Information | Persistent ID / URL |
|-----------------|---------|------------------|-------------------|-------------------|---------------------|
| Parent - Male   |         |                  |                   |                   |                     |
| Parent - Female |         |                  |                   |                   |                     |

### Antibodies

| Target antigen                                         | Vendor or Source   | Catalog #   | Working concentration | Lot # (preferred but not required) | Persistent ID / URL |
|--------------------------------------------------------|--------------------|-------------|-----------------------|------------------------------------|---------------------|
| Cardiac Troponin T                                     | Abcam              | ab45932     | 1:200                 |                                    |                     |
| $\alpha$ -actinin                                      | Sigma-Aldrich      | A7732       | 1:200                 |                                    |                     |
| FITC secondary                                         | A16067             | A16067      | 1:250                 |                                    |                     |
| Rhodamine secondary                                    | Life Technologies  | 31663       | 1:250                 |                                    |                     |
| DAPI                                                   | Vector labs        | D1306       | 1:5000                |                                    |                     |
| NAA10                                                  | Novus              | NBF2-19461  | 1:1000                |                                    |                     |
| NAA15                                                  | Sigma-Aldrich      | HPA023589   | 1:1000                |                                    |                     |
| Beta-Actin                                             | Thermo-Scientific  | MA5-15739   | 1:5000                |                                    |                     |
| rabbit IgG HRP secondary                               | Thermo-Scientific  | 65-6111     | 1:2000                |                                    |                     |
| <u>Peroxidase Affinipure Goat Anti-Mouse IgG (H+L)</u> | Jackson laboratory | 115-035-003 | 1:10,000              |                                    |                     |

### DNA/cDNA Clones

| Clone Name | Sequence | Source / Repository | Persistent ID / URL |
|------------|----------|---------------------|---------------------|
|            |          |                     |                     |
|            |          |                     |                     |
|            |          |                     |                     |

**Cultured Cells**

| <b>Name</b>    | <b>Vendor or Source</b>                         | <b>Sex (F, M, or unknown)</b> | <b>Persistent ID / URL</b> |
|----------------|-------------------------------------------------|-------------------------------|----------------------------|
| PGP1 iPS cells | George Church lab,<br>Harvard Medical<br>School | M                             |                            |
|                |                                                 |                               |                            |
|                |                                                 |                               |                            |

**Data & Code Availability**

| <b>Description</b>                | <b>Source / Repository</b>                      | <b>Persistent ID / URL</b>                             |
|-----------------------------------|-------------------------------------------------|--------------------------------------------------------|
| Mass spectrometry proteomics data | <i>ProteomeXchange Consortium via the PRIDE</i> | <i>PXD018013 and <a href="#">10.6019/PXD018013</a></i> |
| RNAseq data                       | <i>GEO public data respository</i>              | <i>GSE160809</i>                                       |
|                                   |                                                 |                                                        |

**Other**

| <b>Description</b> | <b>Source / Repository</b> | <b>Persistent ID / URL</b> |
|--------------------|----------------------------|----------------------------|
|                    |                            |                            |
|                    |                            |                            |
|                    |                            |                            |
